# Supplementary material for: Novel morphology-controlled synthesis of homogeneous LiFePO4 for Li-ion batteries using an organic phosphate source
Source: Royal Society of Chemistry journal article supplement (doi:10.1039/c3ra42035c), 2013-01-01
Supplement: c3ra42035c.pdf [file c3ra42035c.pdf]

Electronic Supplementary Information (ESI)

# **Novel Morphology-Controlled Synthesis of Homogeneous LiFePO<sub>4</sub> for Li-ion Batteries Using an Organic Phosphate Source**

Youngjin Park,<sup>1</sup> Kwang-chul Roh,<sup>2</sup> Woonsup Shin\*<sup>1</sup> and Jae-won Lee\*<sup>3</sup>

<sup>1</sup>*Department of Chemistry, Interdisciplinary Program of Integrated Biotechnology and Inorganic & Bio-Material Center of BK 21, Sogang University, Seoul 121-742, Republic of Korea;*

<sup>2</sup>*Korea Institute of Ceramic Engineering and Technology, Guemcheon, Seoul 153-801, Republic of Korea*

<sup>3</sup>*Department of Energy Engineering, Dankook University, Cheonan 330-714, Republic of Korea*

## Experimental

In this work, all chemicals were used as purchased without further purification.

### a. Synthesis of LFP hollow spheres and nanoplates

The samples of LFP were prepared by hydrothermal method in an autoclaved stainless steel reactor. The starting materials were  $\text{FeSO}_4 \cdot 7\text{H}_2\text{O}$ , phosphate ester (TRITON XQS-20) and  $\text{LiOH} \cdot \text{H}_2\text{O}$ ; the molar ratio of the Li : Fe : P was 3 : 1 : 1; starting materials were separately dissolved in 20 mL distilled water; the concentration of LFP precursor solutions were 0.25 M in the final mixture.

#### Synthesis of LFP nanoplates

For the synthesis of LFP nanoplates, the mixing sequence was exchanged. In this case, the LiOH solution was added into a mixed solution of TRITON H-66 and  $\text{FeSO}_4 \cdot 7\text{H}_2\text{O}$ , and the resultant mixture was hydrothermally treated at 180 °C for 18 h. The pH value of the solution was 7.3.

#### Synthesis of LFP hollow spheres

In a typical procedure, LiOH solution was added to TRITON H-66 solution.  $\text{FeSO}_4$  solution was added to the mixed solution with constant stirring. The pH value of the solution was 7.1.

The autoclave was sealed and heated to 180 °C for 18 h. After being cooled to room temperature, the obtained precipitates were collected by centrifugation and washed several times with deionized water. Then the samples were dried at 80 °C.

To achieve the conductive carbon coating, the hydrothermal products were mixed with 20 wt.% of sucrose, and then carbonized at 650 °C for 5 h under Ar-H<sub>2</sub> (98:2) atmosphere with a heating rate of 5 °C/min

## **b. Material Characterizations**

The crystal structure of the resulting powder was analyzed by powder X-ray diffraction (XRD, Rigaku D/Max-2500/PC, Japan), using a Cu-K $\alpha$  radiation source. The particle size and shape of the samples were examined by field emission scanning microscopy (FE-SEM, S-800, Hitachi, Japan). The chemical composition of the sample was analyzed by inductively coupled plasma (ICP) and energy-dispersive X-ray spectroscopy (EDS, S-800, Hitachi, Japan).

## **c. Electrochemical Measurements**

A coin cell (CR2016) was used to determine the electrochemical performance of the obtained samples. A positive electrode was made by coating a slurry of the active material, Super P carbon black (MMM, Belgium), and a poly-(vinylidene fluoride) binder (Kurea, Japan) at a weight ratio of 8:1:1 onto an aluminum foil current collector. The electrolyte was a 1.0 M LiPF<sub>6</sub> solution in ethylene carbonate/ethyl methyl carbonate (1/1 vol %, Cheil Ind., Korea). Li metal was used as a negative electrode. Galvanostatic charge and discharge tests of the cell were carried out at constant current–constant voltage (CC-CV) mode, and the performed between 2.0 and 4.3 V at room temperature.

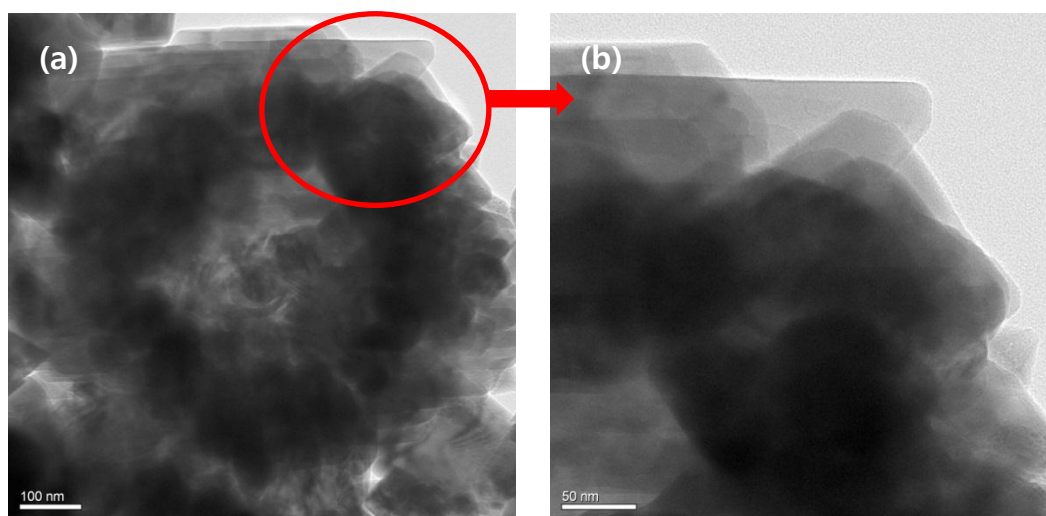

**Figure S1** TEM images of LFP (a) the hollow sphere and (b) shell of the hollow sphere.

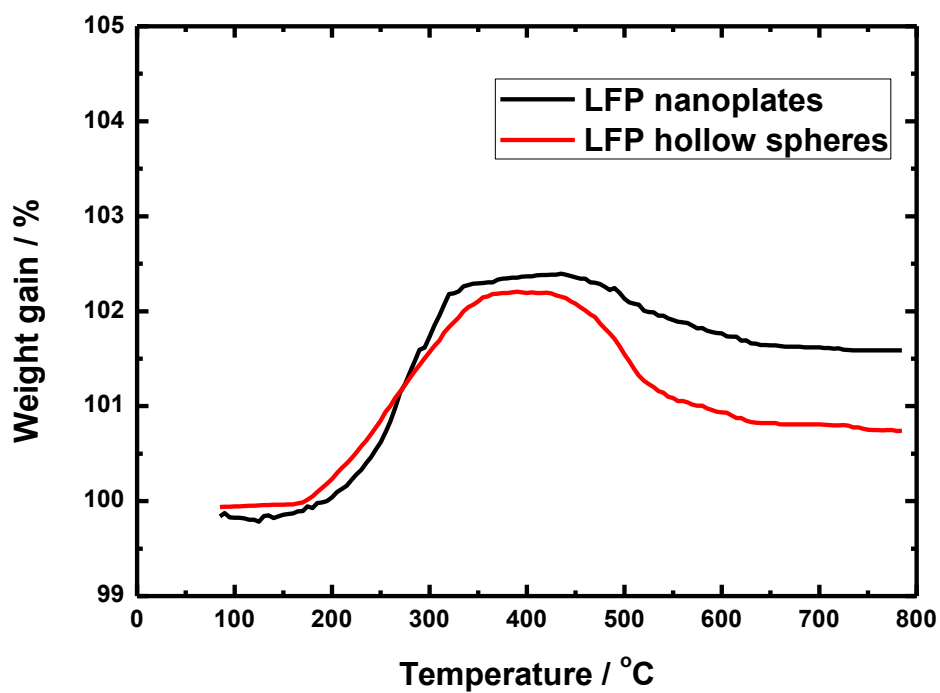

**Figure S2** TGA curves of the carbon-coated LFP nanoplates and hollow spheres.

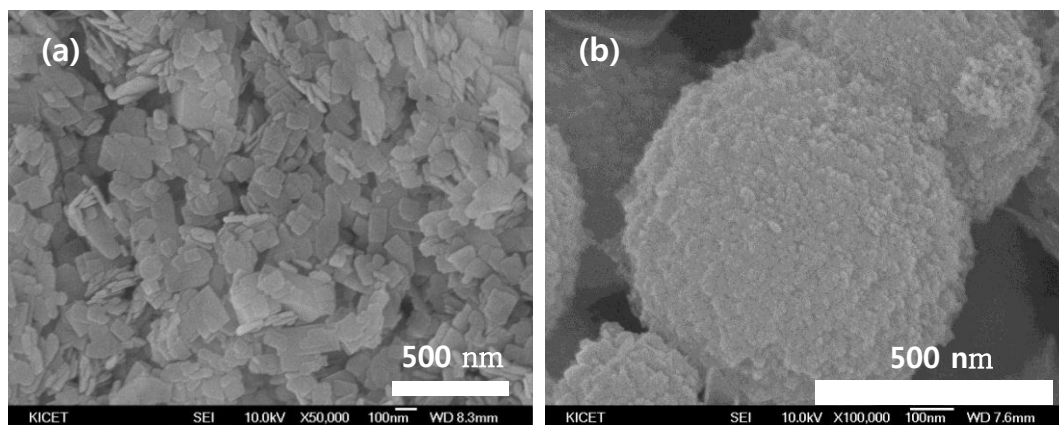

**Figure S3** SEM images of the samples synthesized by adjusting synthesis parameters: a) Quadruple the concentrations of the reactants; b) 120 °C. The other synthesis parameters are kept unchanged with those for the synthesis of the LFP hollow spheres.
